# Supplementary material for: Assessment of Chitosan-Affected Metabolic Response by Peroxisome Proliferator-Activated Receptor Bioluminescent Imaging-Guided Transcriptomic Analysis
Source: PubMed Central journal article supplement (PMC3319625; doi:10.1371/journal.pone.0034969), 2012-04-04
Supplement: pone.0034969.s001.pdf [file pone.0034969.s001.pdf]

**Table S1**Expression levels of chitosan-regulated genes<sup>a</sup> in the stomach.

| Gene symbol | Gene description                                                                         | Fold change <sup>b</sup> |
|-------------|------------------------------------------------------------------------------------------|--------------------------|
| Ywhab       | Tyrosine 3-monooxygenase/tryptophan 5-monooxygenase activation protein, beta polypeptide | -64.23±0.03              |
| Defb4       | Defensin beta 4                                                                          | -53.75±0.03              |
| Ccdc45      | Coiled-coil domain-containing protein 45.                                                | -46.61±0.04              |
| Fbxl14      | F-box and leucine-rich repeat protein 14                                                 | -43.59±0.04              |
| Col10a1     | Procollagen, type X, alpha 1                                                             | -18.77±0.09              |
| Psme2       | Psme2 protein                                                                            | -12.70±0.13              |
| Pgc         | Progastricsin (pepsinogen C)                                                             | -9.45±0.03               |
| Ghrl        | Ghrelin                                                                                  | -9.13±0.03               |
| Serpib8     | Serine (or cysteine) peptidase inhibitor, clade B, member 8                              | -7.93±0.19               |
| Slc22a6     | Solute carrier family 22 (organic anion transporter), member 6                           | -7.59±0.20               |
| Tff2        | Trefoil factor 2 (spasmolytic protein 1)                                                 | -7.57±0.07               |
| Itfg1       | T-cell immunomodulatory protein precursor                                                | -6.73±0.22               |
| Nos2        | Nitric oxide synthase 2, inducible, macrophage                                           | -6.67±0.21               |
| Glod5       | Glyoxalase domain-containing protein 5.                                                  | -6.51±0.06               |
| Mrpl38      | Mitochondrial ribosomal protein L38                                                      | -6.36±0.23               |
| Rtp4        | Receptor-transporting protein 4 (28 kDa interferon-responsive protein).                  | -6.07±0.24               |
| Eras        | ES cell-expressed Ras                                                                    | -5.99±0.02               |
| Agr2        | Anterior gradient 2 ( <i>Xenopus laevis</i> )                                            | -5.97±0.03               |
| Apob        | Apolipoprotein B                                                                         | -5.50±0.25               |
| Foxc1       | Forkhead box protein C1                                                                  | -5.48±0.26               |
| Kcne2       | Potassium voltage-gated channel, Isk-related subfamily, gene 2                           | -4.89±0.07               |
| Atp4a       | ATPase, H <sup>+</sup> /K <sup>+</sup> exchanging, gastric, alpha polypeptide            | -4.86±0.12               |
| Gkn2        | Gastroke-2 precursor                                                                     | -4.74±0.16               |
| V1rc15      | Vomer nasal 1 receptor, C15                                                              | -4.68±0.29               |
| Gif         | Gastric intrinsic factor                                                                 | -4.54±0.05               |
| Apoa1       | Apolipoprotein A-I                                                                       | -4.48±0.05               |
| Chia        | Acidic mammalian chitinase precursor                                                     | -4.48±0.09               |
| Rnf126      | Ring finger protein 126                                                                  | -4.46±0.29               |
| Cga         | Glycoprotein hormones, alpha subunit                                                     | -4.43±0.30               |
| Clps        | Colipase, pancreatic                                                                     | -4.37±0.09               |
| Lmo4        | LIM domain only 4                                                                        | -4.33±0.05               |
| Mmab        | Methylmalonic aciduria (cobalamin deficiency) type B homolog                             | -4.32±0.32               |
| Alb         | Serum albumin precursor.                                                                 | -4.24±0.05               |
| Serpina1a   | Serine (or cysteine) peptidase inhibitor, clade A, member 1a                             | -4.24±0.08               |
| Ttc28       | Tetratricopeptide repeat protein 28 (TPR repeat protein 28).                             | -4.06±0.33               |
| Gsdma2      | Gasdermin 2                                                                              | -3.99±0.07               |
| Dvl3        | Dishevelled 3, dsh homolog ( <i>Drosophila</i> )                                         | -3.91±0.29               |
| Ms4a1       | Membrane-spanning 4-domains, subfamily A, member 1                                       | -3.74±0.33               |
| Sult1c2     | Sulfotransferase family, cytosolic, 1C, member 2                                         | -3.72±0.02               |
| Pla2g1b     | Phospholipase A2, group IB, pancreas                                                     | -3.70±0.21               |
| Rab13       | RAB, member of RAS oncogene family-like 3                                                | -3.63±0.34               |

|           |                                                                                           |            |
|-----------|-------------------------------------------------------------------------------------------|------------|
| Pzca      | Prostate stem cell antigen                                                                | -3.53±0.33 |
| Sst       | Somatostatin                                                                              | -3.53±0.11 |
| Ptp4a1    | Protein tyrosine phosphatase 4a1                                                          | -3.22±0.37 |
| Gsta2     | Glutathione S-transferase, alpha 2                                                        | -3.19±0.16 |
| Mal       | Myelin and lymphocyte protein, T-cell differentiation protein                             | -3.15±0.07 |
| Oosp1     | Oocyte secreted protein 1                                                                 | -3.14±0.38 |
| Atp4b     | ATPase, H <sup>+</sup> /K <sup>+</sup> exchanging, beta polypeptide                       | -3.03±0.17 |
| Eif4a2    | Eukaryotic translation initiation factor 4A2                                              | -3.00±0.38 |
| Thrsp     | Thyroid hormone responsive SPOT14 homolog                                                 | -2.94±0.11 |
| Ddx19b    | DEAD (Asp-Glu-Ala-Asp) box polypeptide 19b                                                | -2.90±0.40 |
| Pon2      | Paraoxonase 2                                                                             | -2.90±0.40 |
| Cox5a     | Cytochrome c oxidase, subunit Va                                                          | -2.89±0.23 |
| Osbpl9    | Oxysterol binding protein-like 9                                                          | -2.88±0.39 |
| Cox7a2    | Cytochrome c oxidase, subunit VIIa 2                                                      | -2.87±0.12 |
| Glul      | Glutamate-ammonia ligase (glutamine synthetase)                                           | -2.81±0.17 |
| Tm4sf5    | Transmembrane 4 superfamily member 5                                                      | -2.78±0.09 |
| Tff1      | Trefoil factor 1                                                                          | -2.77±0.24 |
| Gcnt3     | Beta-1,3-galactosyl-O-glycosyl-glycoprotein beta-1,6-N- acetylglucosaminyltransferase 3   | -2.76±0.22 |
| Mei1      | Meiosis defective 1                                                                       | -2.70±0.41 |
| Gsta2     | Glutathione S-transferase, alpha 2 (Yc2)                                                  | -2.70±0.20 |
| Dapp1     | Dual adaptor for phosphotyrosine and 3-phosphoinositides 1                                | -2.70±0.40 |
| Pgr       | Progesterone receptor                                                                     | -2.69±0.42 |
| Wdr26     | WD repeat domain 26                                                                       | -2.68±0.40 |
| Ptpn9     | Protein tyrosine phosphatase, non-receptor type 9                                         | -2.68±0.39 |
| Pla2g12b  | Phospholipase A2, group XIIB                                                              | -2.59±0.06 |
| Hnrnpa1   | Heterogeneous nuclear ribonucleoprotein A1                                                | -2.59±0.38 |
| Dynlt1    | Dynein light chain Tctex-type 1                                                           | -2.57±0.09 |
| Tra2      | Transformer-2 protein homolog                                                             | -2.55±0.36 |
| Cox7a1    | Polymerase (RNA) II (DNA directed) polypeptide I                                          | -2.53±0.17 |
| Gmppb     | Adhesion molecule with Ig like domain 3                                                   | -2.52±0.43 |
| Msi2      | RNA-binding protein Musashi homolog 2 (Musashi-2).                                        | -2.51±0.40 |
| Scd1      | Stearoyl-Coenzyme A desaturase 1                                                          | -2.49±0.23 |
| Serpina1e | Serine (or cysteine) peptidase inhibitor, clade A, member 1a                              | -2.47±0.38 |
| Atp5f1    | ATP synthase, H <sup>+</sup> transporting, mitochondrial F0 complex, subunit b, isoform 1 | -2.44±0.18 |
| S100a11   | S100 calcium binding protein A11 (calizzarin)                                             | -2.41±0.22 |
| Ndufs4    | NADH dehydrogenase (ubiquinone) Fe-S protein 4                                            | -2.41±0.06 |
| Fkbp3     | FK506 binding protein 3                                                                   | -2.36±0.14 |
| Uqcrb     | Ubiquinol-cytochrome c reductase binding protein                                          | -2.35±0.27 |
| Dennd1a   | DENN domain-containing protein 1A.                                                        | -2.35±0.43 |
| Cox11     | COX11 homolog, cytochrome c oxidase assembly protein (yeast)                              | -2.30±0.11 |
| Csprs     | Component of Sp100-rs                                                                     | -2.30±0.42 |
| Lman11    | Protein ERGIC-53-like precursor                                                           | -2.30±0.48 |
| Plac9     | Placenta specific 9                                                                       | -2.29±0.11 |
| Tmem179b  | transmembrane protein 179B                                                                | -2.26±0.13 |

|          |                                                                        |            |
|----------|------------------------------------------------------------------------|------------|
| Copb1    | Coatomer protein complex, subunit beta 1                               | -2.25±0.19 |
| Mid1     | Midline 1                                                              | -2.24±0.44 |
| Il17rd   | Interleukin 17 receptor D                                              | -2.24±0.43 |
| Axot     | Membrane-associated ring finger (C3HC4) 7                              | -2.23±0.49 |
| Plac8    | Placenta-specific 8                                                    | -2.21±0.11 |
| Clic6    | Chloride intracellular channel 6                                       | -2.20±0.10 |
| Padi2    | Peptidyl arginine deiminase, type II                                   | -2.18±0.42 |
| Psp      | Parotid secretory protein                                              | -2.16±0.48 |
| Ces2     | Carboxylesterase 2                                                     | -2.16±0.03 |
| Lpl      | Lipoprotein lipase precursor                                           | -2.14±0.06 |
| Ndufb4   | NADH dehydrogenase (ubiquinone) 1 beta subcomplex 4                    | -2.14±0.28 |
| Fundc2   | FUN14 domain containing 2                                              | -2.13±0.19 |
| Lgals4   | Lectin, galactose binding, soluble 4                                   | -2.13±0.21 |
| Golm1    | Golgi membrane protein 1                                               | -2.12±0.06 |
| B2m      | Beta-2 microglobulin                                                   | -2.10±0.16 |
| Foxa3    | Forkhead box A3                                                        | -2.09±0.08 |
| Sfn      | Stratifin                                                              | -2.08±0.38 |
| Ocel1    | Occludin/ELL domain-containing protein 1.                              | -2.08±0.13 |
| Cript    | Cysteine-rich PDZ-binding protein                                      | -2.07±0.21 |
| Akr1b8   | Aldo-keto reductase family 1, member B8                                | -2.06±0.13 |
| Cidec    | Cell death-inducing DFFA-like effector c                               | -2.06±0.43 |
| Lsm7     | LSM7 homolog, U6 small nuclear RNA associated ( <i>S. cerevisiae</i> ) | -2.06±0.20 |
| Tbca     | Tubulin cofactor a                                                     | -2.05±0.30 |
| Gstm2    | Glutathione S-transferase, mu 1                                        | -2.05±0.27 |
| BC057371 | CDNA sequence BC057371                                                 | -2.03±0.46 |
| Tmem60   | Transmembrane protein 60.                                              | -2.03±0.46 |
| Mgst3    | Microsomal glutathione S-transferase 3                                 | -2.03±0.18 |
| Hamp2    | Hepcidin-2 precursor                                                   | -2.01±0.12 |
| Krt19    | Keratin, type I cytoskeletal 19                                        | -2.00±0.24 |
| Preli2   | PRELI domain-containing protein 2                                      | -2.00±0.05 |
| Krtcap3  | Keratinocyte associated protein 3                                      | -2.00±0.30 |
| Pla2g12a | Phospholipase A2, group XIIA                                           | -2.00±0.27 |
| Axl      | AXL receptor tyrosine kinase                                           | 2.00±0.78  |
| Krit1    | Krev interaction trapped protein 1                                     | 2.00±1.71  |
| Stk4     | Serine/threonine kinase 4                                              | 2.01±1.63  |
| Ubc      | predicted gene, EG216818                                               | 2.02±1.54  |
| Prep     | Proline arginine-rich end leucine-rich repeat                          | 2.04±0.72  |
| Col4a2   | Procollagen, type IV, alpha 2                                          | 2.06±1.07  |
| Itgb1    | Integrin beta 1 (fibronectin receptor beta)                            | 2.07±0.26  |
| Kprp     | keratinocyte expressed, proline-rich                                   | 2.13±1.34  |
| Krt78    | Krt78 protein                                                          | 2.15±1.09  |
| Itm2b    | Integral membrane protein 2B                                           | 2.16±1.60  |
| Hbp1     | High mobility group box transcription factor 1                         | 2.23±0.59  |
| Eef2     | Eukaryotic translation elongation factor 2                             | 2.26±0.36  |

|          |                                                                            |               |
|----------|----------------------------------------------------------------------------|---------------|
| SnpH     | Syntrophin                                                                 | 2.29±2.16     |
| Oas1f    | 2'-5' oligoadenylate synthetase 1F                                         | 2.33±2.21     |
| Tpm1     | Tropomyosin 1, alpha                                                       | 2.35±0.51     |
| Krt10    | Keratin, type I cytoskeletal 10                                            | 2.38±1.56     |
| Rplp1    | Ribosomal protein, large, P1                                               | 2.42±2.23     |
| Dck      | Deoxycytidine kinase                                                       | 2.67±1.92     |
| Hnrp11   | Heterogeneous nuclear ribonucleoprotein U-like 1                           | 2.67±1.93     |
| Slc10a7  | Sodium/bile acid cotransporter 7                                           | 3.07±1.95     |
| Armc10   | Armadillo repeat-containing protein 10.                                    | 3.25±4.09     |
| Fbxo12   | F-box and WD-40 domain protein 14                                          | 3.56±4.31     |
| Zmynd19  | Zinc finger, MYND domain containing 19                                     | 3.66±0.65     |
| Lrr3     | Leucine rich repeat protein 3, neuronal                                    | 3.75±2.96     |
| Spag9    | Sperm associated antigen 9                                                 | 3.96±2.28     |
| Kif2a    | Kinesin-like protein KIF2A.                                                | 4.05±2.92     |
| Xpo4     | Exportin 4                                                                 | 4.17±5.16     |
| Gnas     | GNAS (guanine nucleotide binding protein, alpha stimulating) complex locus | 4.37±3.32     |
| Prickle2 | Prickle-like protein 2                                                     | 4.55±6.29     |
| Snrpb    | Small nuclear ribonucleoprotein B                                          | 4.74±3.93     |
| Pdzk3    | PDZ domain containing 2                                                    | 5.16±3.46     |
| Rsh11    | Radial spokehead-like 1                                                    | 5.30±3.80     |
| Pin1     | Protein (peptidyl-prolyl cis/trans isomerase) NIMA-interacting 1           | 5.61±3.65     |
| Baz1a    | Bromodomain adjacent to zinc finger domain protein 1A (Cbp146)             | 7.52±11.27    |
| Arfgef2  | ADP-ribosylation factor guanine nucleotide-exchange factor 2               | 23.73±39.50   |
| Ralb     | V-ras simian leukemia viral oncogene homolog B (ras related)               | 53.02±90.58   |
| Pitpnb   | Phosphatidylinositol transfer protein, beta                                | 192.98±332.62 |

<sup>a</sup> Genes with fold changes  $\geq 2$  or  $\leq -2$  are shown.

<sup>b</sup> Values are mean  $\pm$  standard error ( $n=3$ ).
